# Supplementary material for: A new class of hybrid super-supertetrahedral cluster and its assembly into a five-fold interpenetrating network
Source: Royal Society of Chemistry journal article supplement (doi:10.1039/c7dt00280g), 2017-01-01
Supplement: c7dt00280g1.pdf [file c7dt00280g1.pdf]

## SUPPLEMENTARY INFORMATION

*A new class of hybrid super-supertetrahedral cluster and its assembly into a five-fold interpenetrating network*

P. Vaqueiro,<sup>a\*</sup> S. Makin,<sup>a</sup> Y. Tong<sup>b</sup> and S. J. Ewing<sup>b</sup>

a. Department of Chemistry, University of Reading, Reading RG6 6AD, UK.

b. Institute of Chemical Sciences, Heriot-Watt University, Edinburgh EH14 4AS, UK.

## **Experimental details:**

### *1. Powder X-ray diffraction:*

Finely ground bulk samples were scanned on a Bruker D8 Discover diffractometer, equipped with a Lynx Eye linear detector and using nickel-filtered Cu K $\alpha$  radiation ( $\lambda=1.54178 \text{ \AA}$ ). This instrument, which is equipped with a Goebel mirror, operates in transmission mode.

### *2. FT-IR:*

Infrared measurements were carried out using a Perkin Elmer Spectrum 100 ATR spectrometer. Data were collected on ground single crystals.

### *3. Thermogravimetric analysis:*

Thermogravimetric analysis was performed using a TA Instruments SDT Q600 DSC-TGA on ground, hand-picked crystals, under an atmosphere of air. The sample was heated from room temperature up to 800 °C, using a heating rate of 5 °C min<sup>-1</sup>, and held at 800 °C for 30 minutes.

### *4. UV-Vis diffuse reflectance:*

Diffuse-reflectance measurements were collected using a Perkin Elmer Lambda 35 UV-vis spectrometer. BaSO<sub>4</sub> powder was used as a reference, and the absorption data were calculated from the reflectance data using the Kubelka-Munk function.

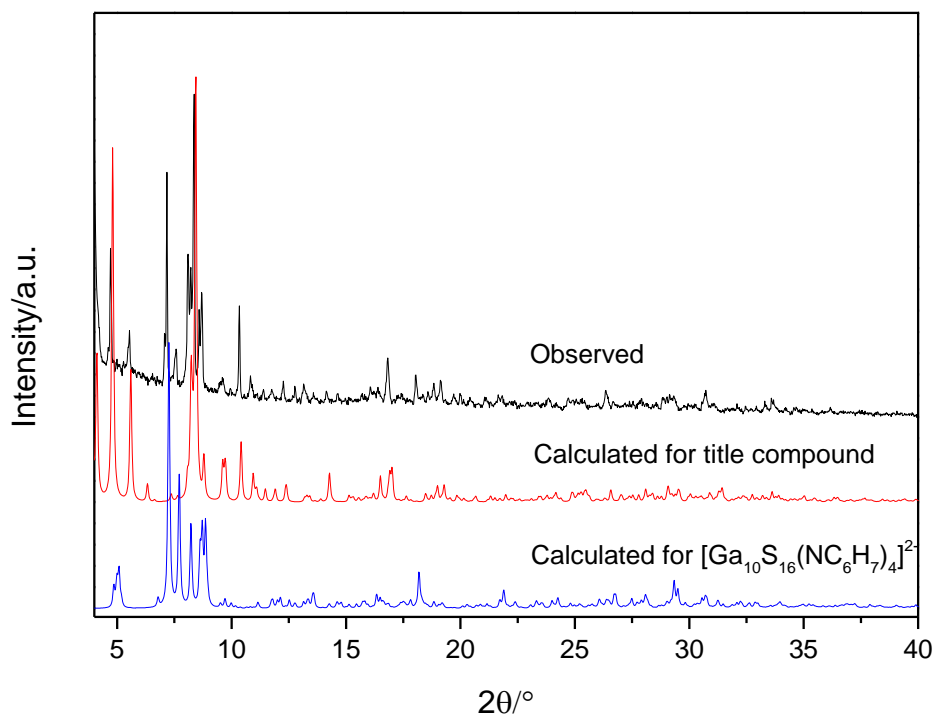

**Figure S1.** Powder X-ray data on a ground bulk sample (black line) and calculated powder diffraction pattern for the title compound (red line) and for  $[\text{C}_{12}\text{H}_{10}\text{N}_2]_2[\text{C}_{12}\text{H}_{12}\text{N}_2]_2[\text{C}_6\text{H}_8\text{N}]_6[\text{Ga}_{10}\text{S}_{16}(\text{NC}_6\text{H}_7)_4]_4$ .<sup>1</sup>

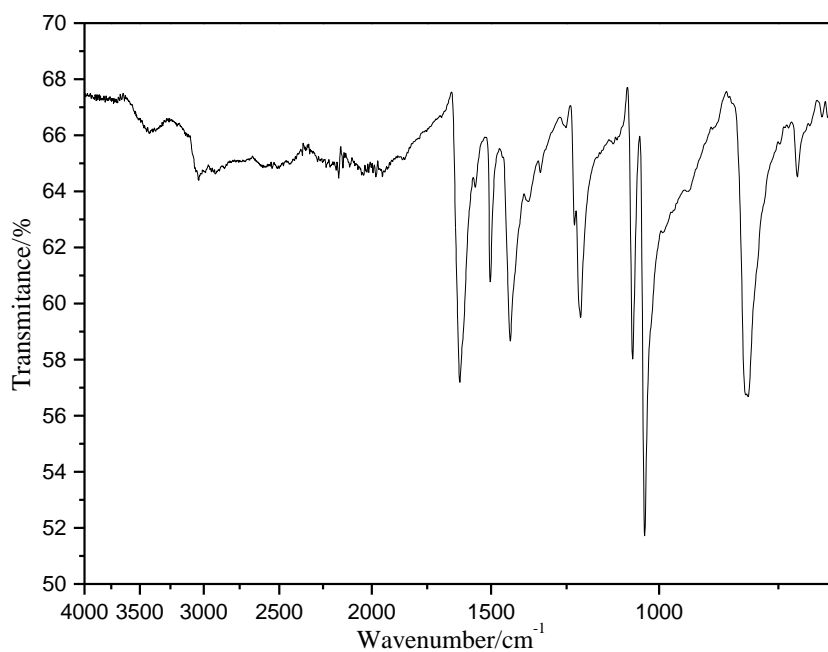

**Figure S2.** FTIR spectrum collected on ground single-crystals of the title compound.

<sup>1</sup> P. Vaquero and M. L. Romero, *Mater. Res. Soc. Symp. Proc.* 2009, 1148E, 1148-PP10-07.
